# Supplementary material for: Exploring Charged Polymeric Cyclodextrins for Biomedical Applications
Source: MDPI journal article supplement (doi:10.3390/molecules26061724), 2021-03-19
Supplement: s1 [file s1]

Supplementary Data

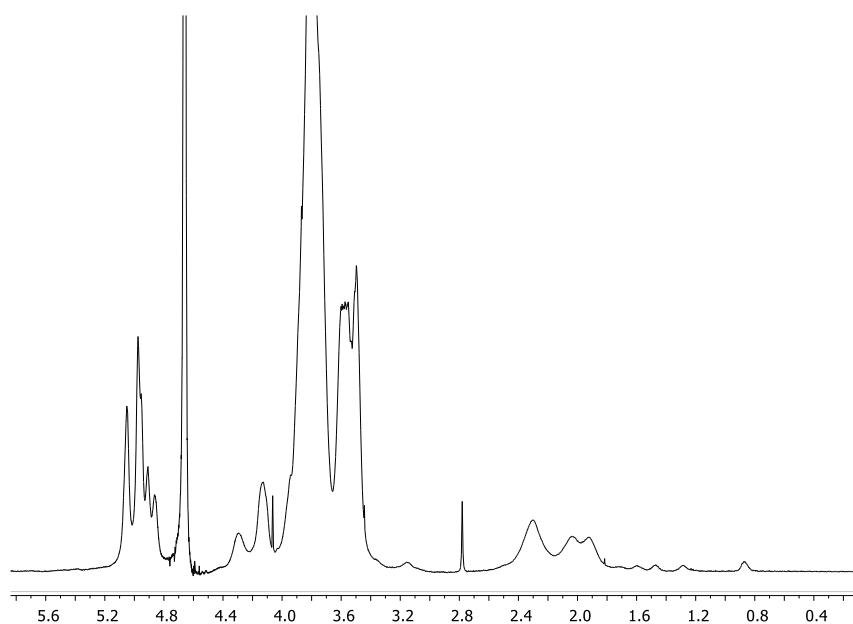

**Figure S1.**  $^1\text{H}$  NMR spectrum of  $\text{PGA}\beta\text{CyDArg1}$  ( $\text{D}_2\text{O}$ , 500 MHz)

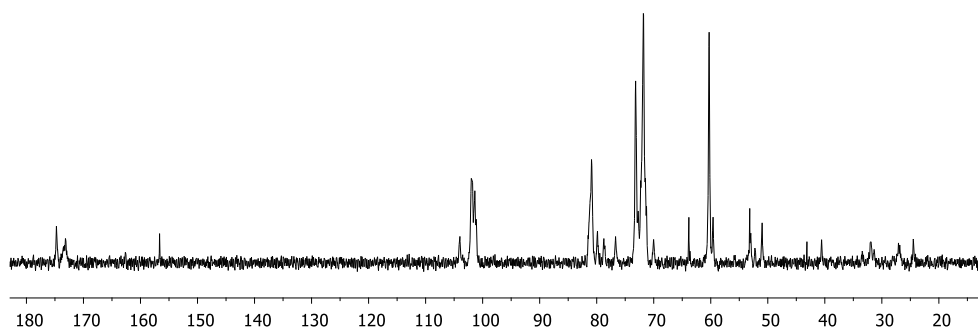

**Figure S2.**  $^{13}\text{C}$  NMR spectrum of  $\text{PGA}\beta\text{CyDArg1}$  ( $\text{D}_2\text{O}$ , 125 MHz)

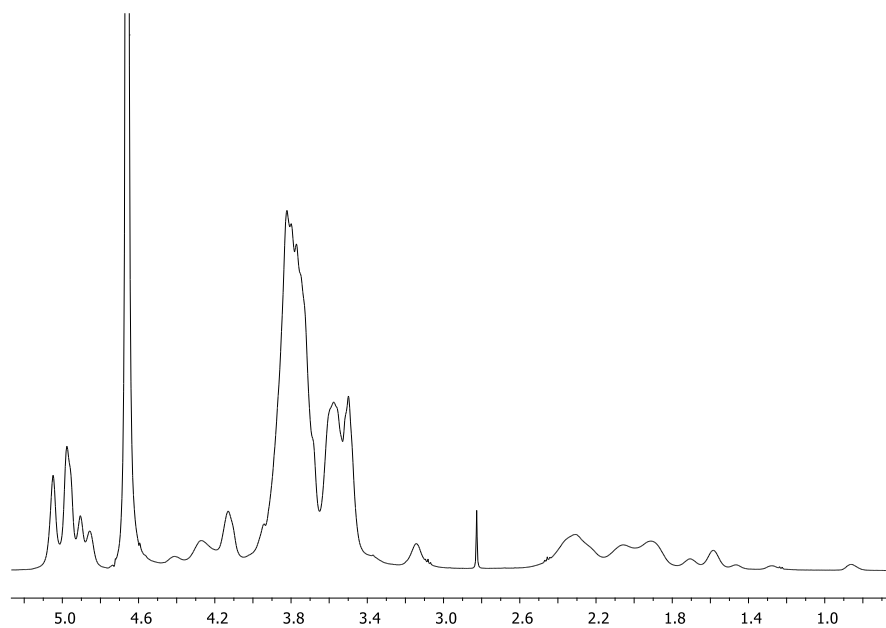

**Figure S3.**  $^1\text{H}$  NMR spectrum of PGA $\beta$ CyDArg2 ( $\text{D}_2\text{O}$ , 500 MHz)

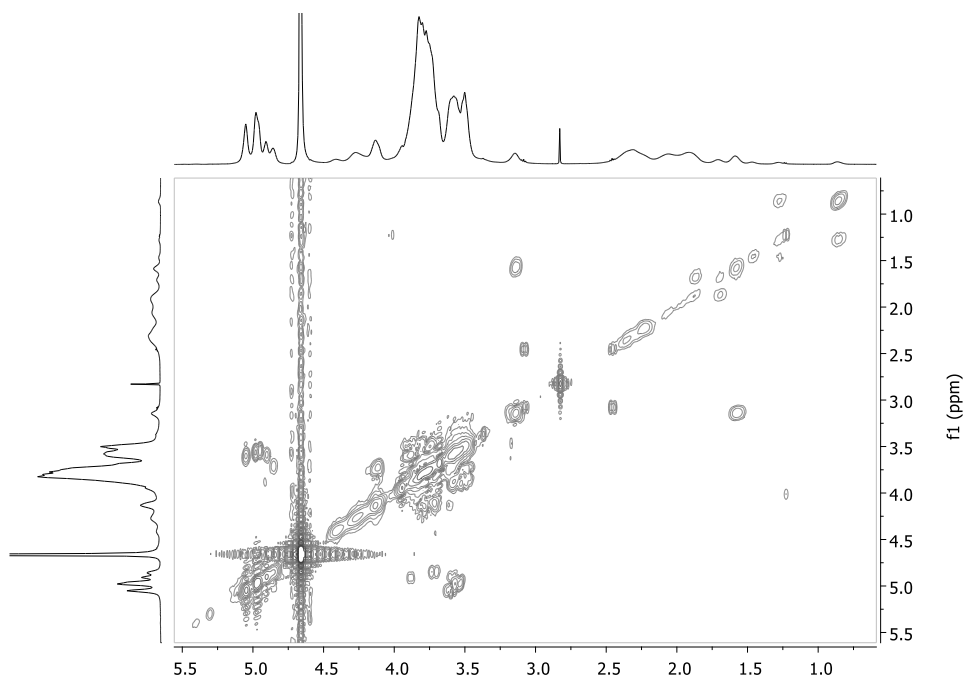

**Figure S4.** COSY spectrum of PGA $\beta$ CyDArg2 ( $\text{D}_2\text{O}$ , 500 MHz)

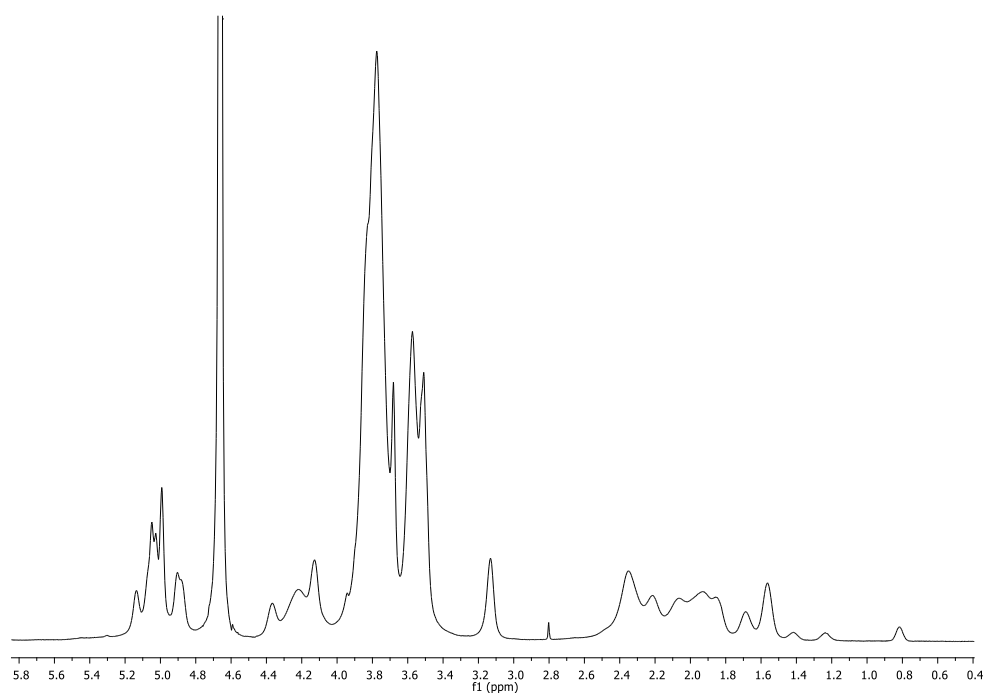

**Figure S5.**  $^1\text{H}$  NMR spectrum of  $\text{PGA}\gamma\text{CyDArg3}$  ( $\text{D}_2\text{O}$ , 500 MHz)

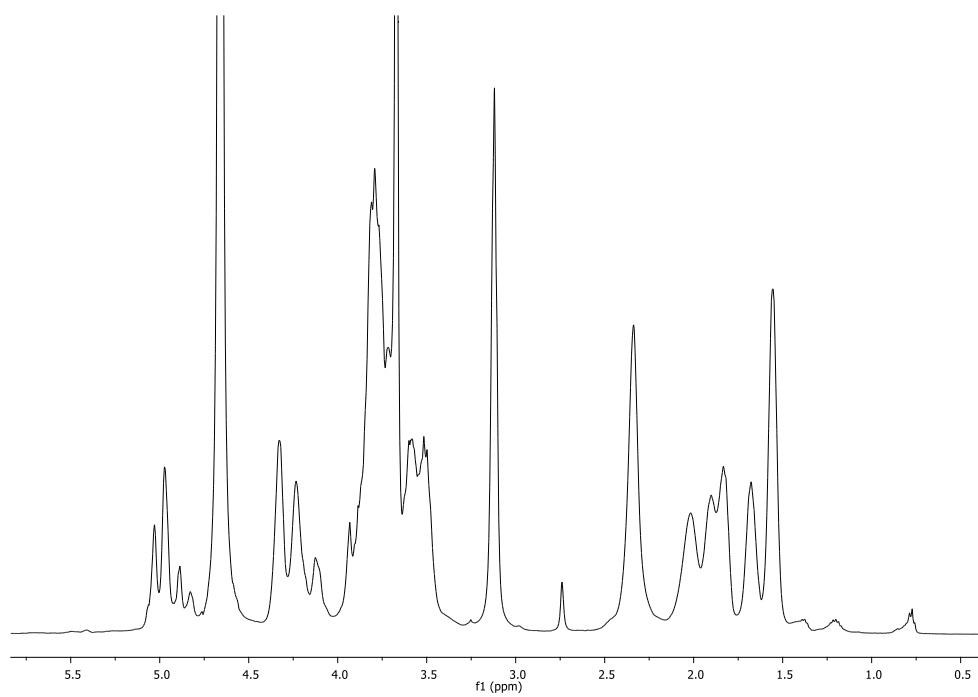

**Figure S6.**  $^1\text{H}$  NMR spectrum of  $\text{PGA}\beta\text{CyDArg4}$  ( $\text{D}_2\text{O}$ , 500 MHz)

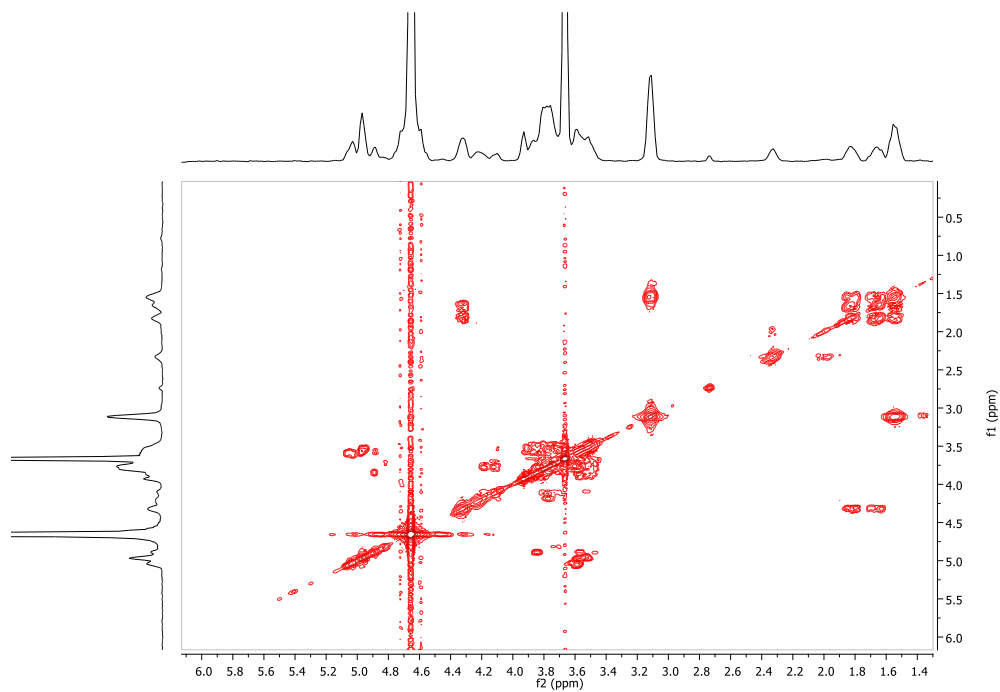

**Figure S7.** COSY spectrum of PGA $\beta$ CyDArg4 ( $D_2O$ , 500 MHz)

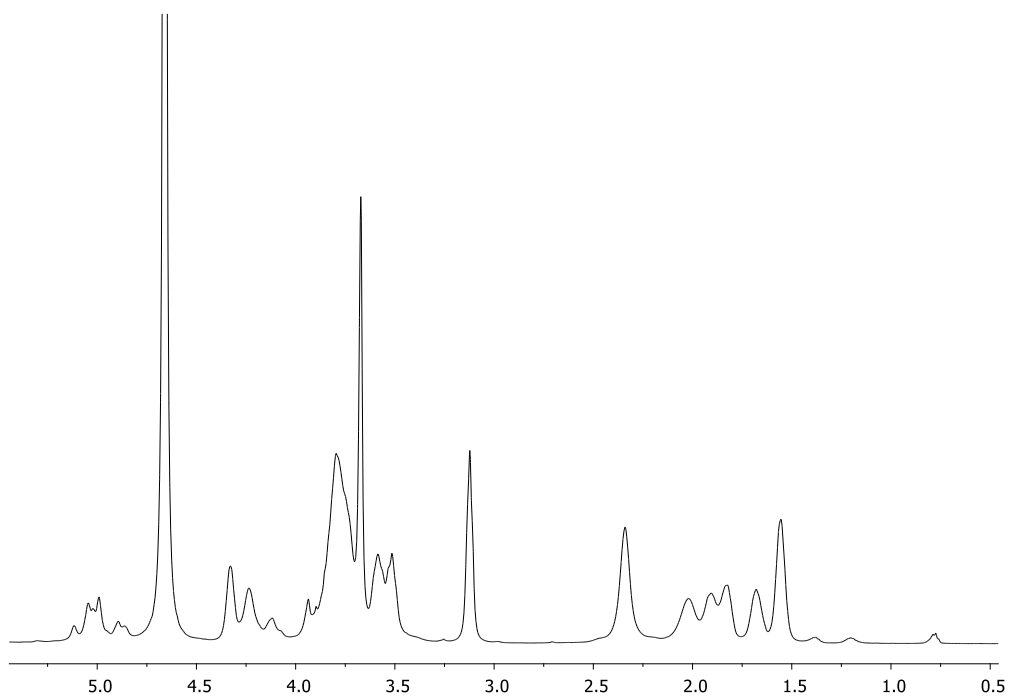

**Figure S8.**  $^1H$  NMR spectrum of PGA $\gamma$ CyDArg5 ( $D_2O$ , 500 MHz)

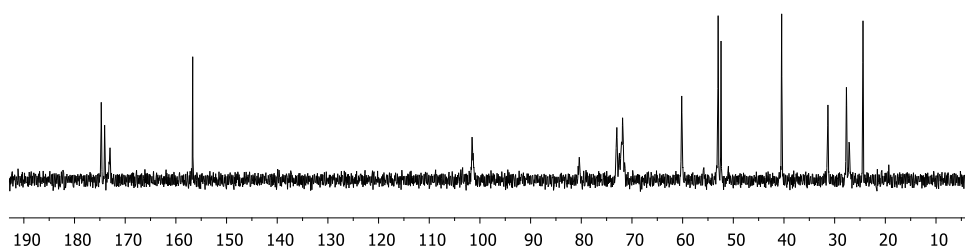

**Figure S9.**  $^{13}\text{C}$  NMR spectrum of  $\text{PGA}\gamma\text{CyDArg5}$  ( $\text{D}_2\text{O}$ , 125 MHz)

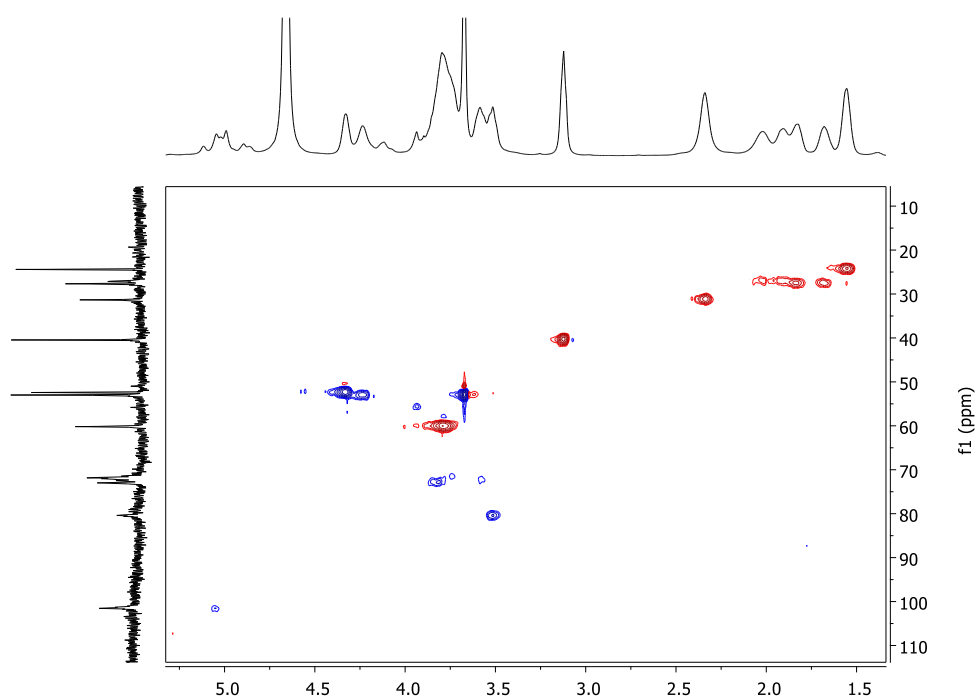

**Figure S10.** HSQC spectrum of  $\text{PGA}\gamma\text{CyDArg5}$  ( $\text{D}_2\text{O}$ , 500 MHz)

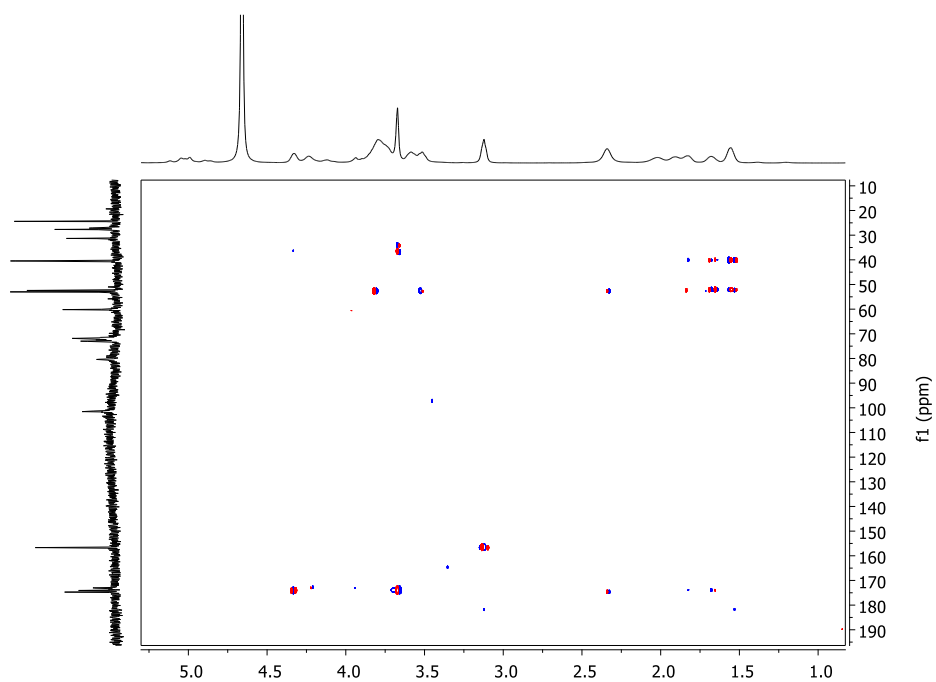

**Figure S11.** *HMBC spectrum of PGA- $\gamma$ -CyD-Arg5 ( $D_2O$ , 500 MHz)*

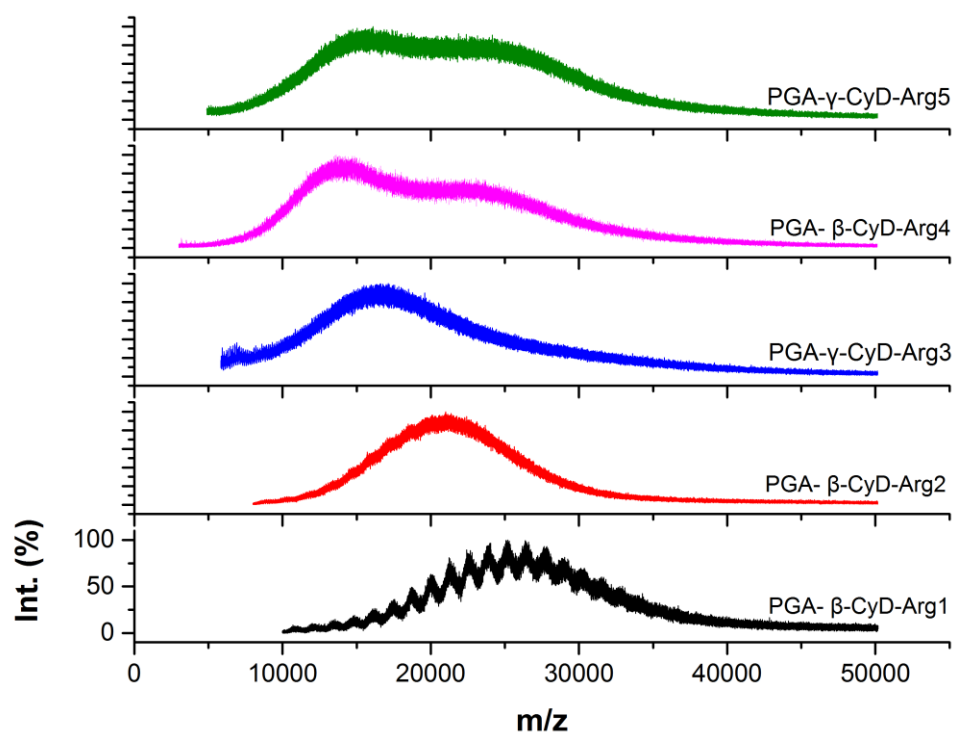

**Figure S12.** MALDI-TOF MS spectra of the PGA- $\beta$ -CyD-Arg polymers

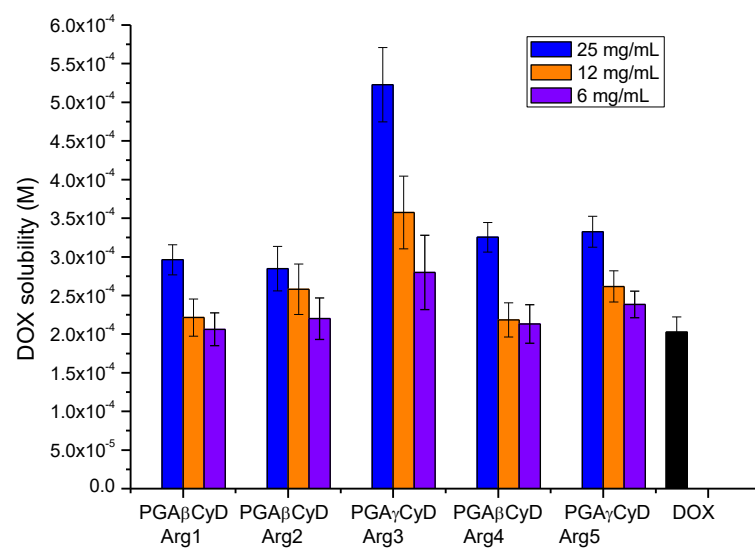

**Figure 13.** Solubility of DOX in the presence of polymers (phosphate buffer, 7.4 pH)
